# Supplementary material for: One-Pot Environmentally Friendly Synthesis of Nanomaterials Based on Phytate-Coated Fe3O4 Nanoparticles for Efficient Removal of the Radioactive Metal Ions 90Sr, 90Y and (UO2)2+ from Water
Source: MDPI journal article supplement (doi:10.3390/nano12244383), 2022-12-09
Supplement: s1 [file s1]

# One-Pot Environmentally Friendly Synthesis of Nanomaterials Based on Phytate-Coated Fe<sub>3</sub>O<sub>4</sub> Nanoparticles for Efficient Removal of the Radioactive Metal Ions <sup>90</sup>Sr, <sup>90</sup>Y and (UO<sub>2</sub>)<sup>2+</sup> from Water

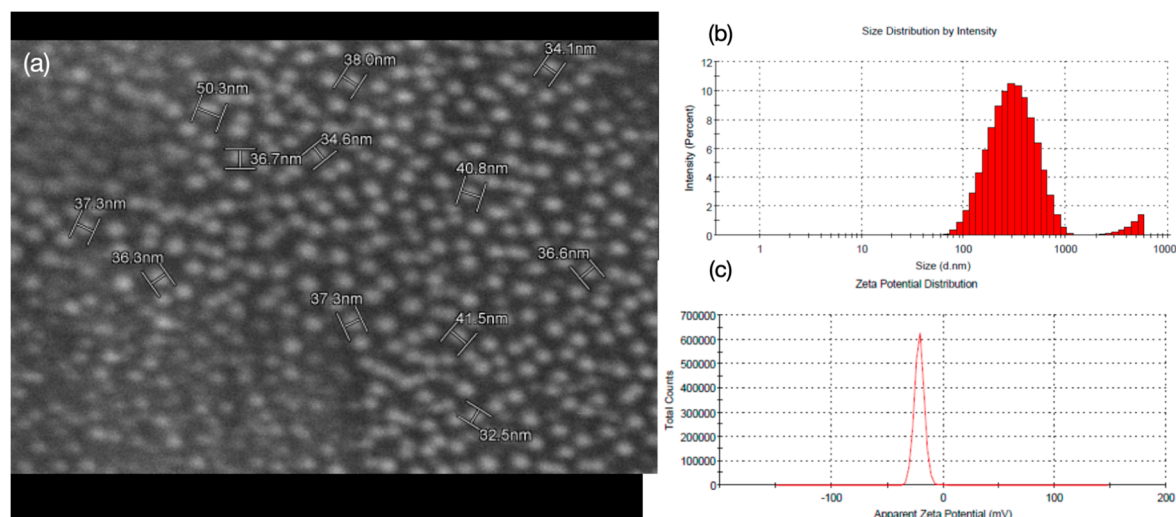

**Figure S1.** **a.** TEM micrograph, **b.** Dynamic light Scattering (DLS) analysis and **c.** Zeta Potential of Fe<sub>3</sub>O<sub>4</sub> NPs.

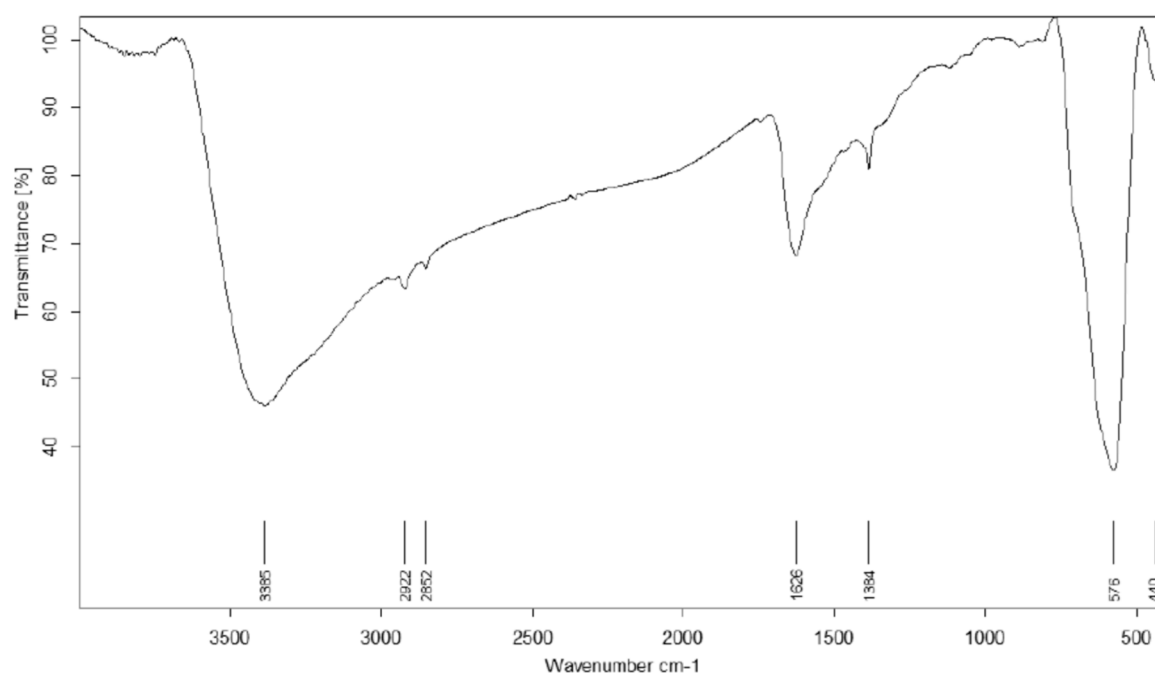

**Figure S2.** FT-IR spectra of pristine magnetite nanoparticles.

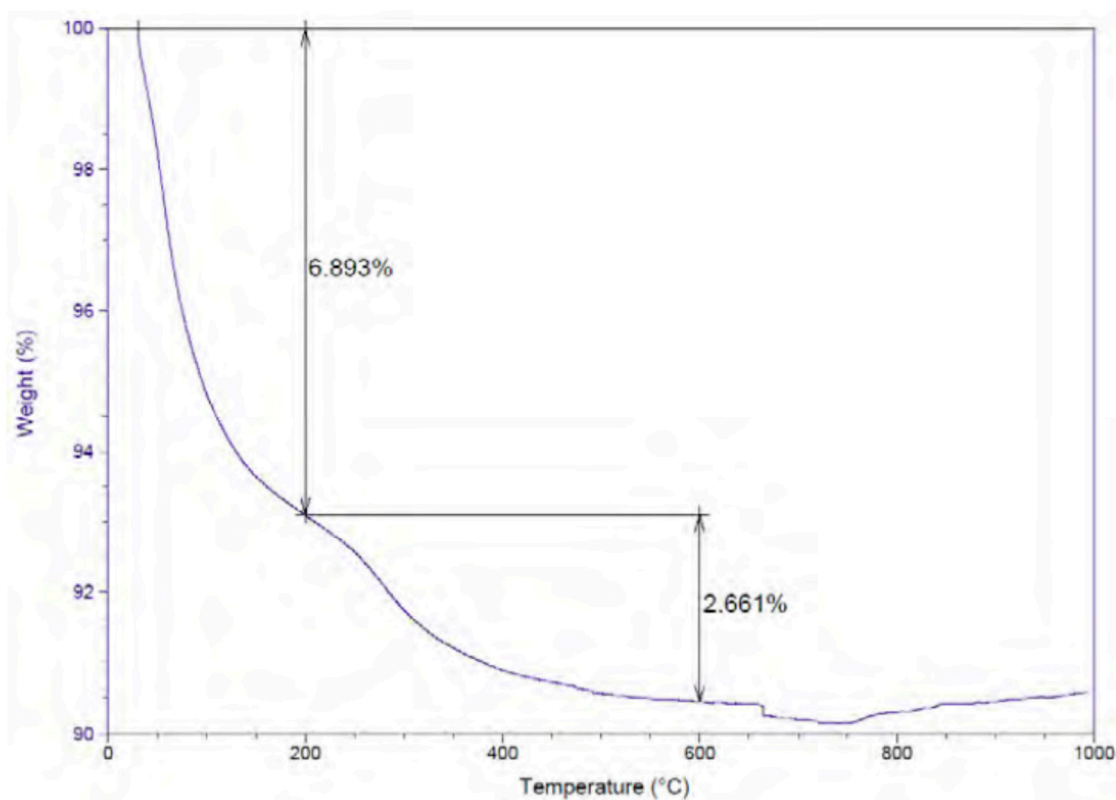

**Figure S3.** Thermogravimetric analysis (TGA) of pristine magnetite nanoparticles.

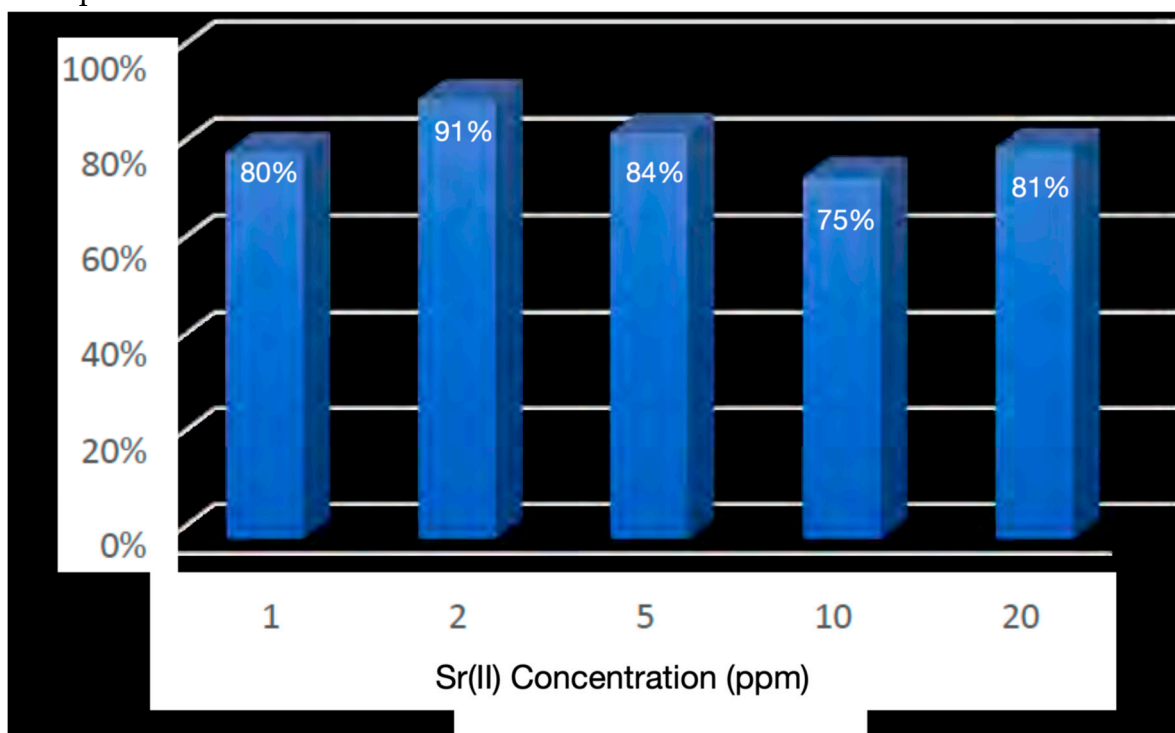

**Figure S4.** Retention percentage of Sr(II) by Phy@Fe<sub>3</sub>O<sub>4</sub> NPs versus the initial concentration of Sr(II).

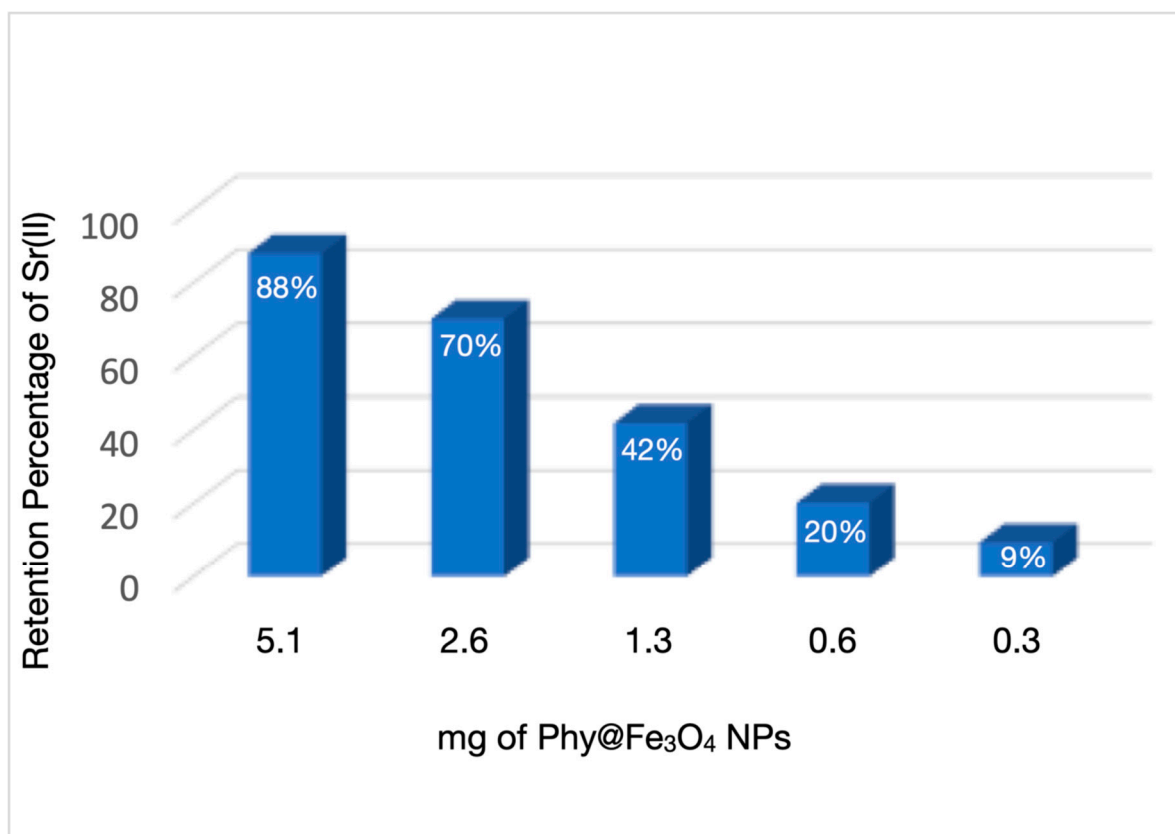

**Figure S5.** Sr(II) retention percentage with different amounts of Phy@Fe<sub>3</sub>O<sub>4</sub> NPs.

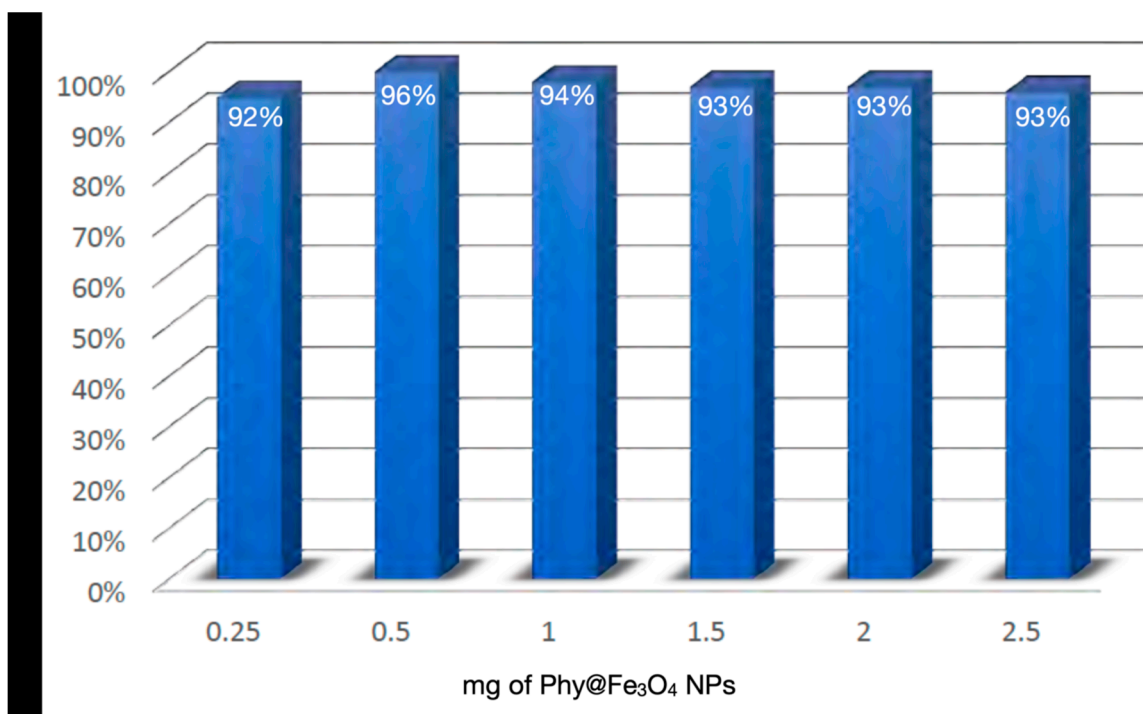

**Figure S6.** UO<sub>22+</sub> retention percentage with different amounts of Phy@Fe<sub>3</sub>O<sub>4</sub> NPs.
